# Supplementary material
Source: HighWire-hosted journal article supplement (https://bmjopen.bmj.com/content/15/2/e089671)
Supplement: inline-supplementary-material-4 [file inline-supplementary-material-4.pdf]

|                                                         |                | Risk of bias domains |    |    |    |    |    |    |           |
|---------------------------------------------------------|----------------|----------------------|----|----|----|----|----|----|-----------|
|                                                         |                | D1                   | D2 | D3 | D4 | D5 | D6 | D7 | Overall   |
| Study                                                   | Masoi & Kibusi |                      |    |    |    |    |    |    |           |
|                                                         | Nuhu et al     |                      |    |    |    |    |    |    |           |
|                                                         | Thompson et al |                      |    |    |    |    |    |    |           |
| Domains:                                                |                |                      |    |    |    |    |    |    | Judgement |
| D1: Bias due to confounding.                            |                |                      |    |    |    |    |    |    | Serious   |
| D2: Bias due to selection of participants.              |                |                      |    |    |    |    |    |    | Moderate  |
| D3: Bias in classification of interventions.            |                |                      |    |    |    |    |    |    | Low       |
| D4: Bias due to deviations from intended interventions. |                |                      |    |    |    |    |    |    |           |
| D5: Bias due to missing data.                           |                |                      |    |    |    |    |    |    |           |
| D6: Bias in measurement of outcomes.                    |                |                      |    |    |    |    |    |    |           |
| D7: Bias in selection of the reported result.           |                |                      |    |    |    |    |    |    |           |
