# Supplementary material
Source: HighWire-hosted journal article supplement (https://bmjopen.bmj.com/content/15/2/e089671)
Supplement: inline-supplementary-material-7 [file inline-supplementary-material-7.pdf]

|       |                        | Risk of bias                                                                                                                                                                                                         |                                                                                     |                                                                                     |                                                                                     |                                                                                     |                                                                                       |                                                                                       |                                                                                                                                                                                                                                                                                                                                                |                                                                                       |
|-------|------------------------|----------------------------------------------------------------------------------------------------------------------------------------------------------------------------------------------------------------------|-------------------------------------------------------------------------------------|-------------------------------------------------------------------------------------|-------------------------------------------------------------------------------------|-------------------------------------------------------------------------------------|---------------------------------------------------------------------------------------|---------------------------------------------------------------------------------------|------------------------------------------------------------------------------------------------------------------------------------------------------------------------------------------------------------------------------------------------------------------------------------------------------------------------------------------------|---------------------------------------------------------------------------------------|
|       |                        | D1                                                                                                                                                                                                                   | D2                                                                                  | D3                                                                                  | D4                                                                                  | D5                                                                                  | D6                                                                                    | D7                                                                                    | D8                                                                                                                                                                                                                                                                                                                                             | Overall                                                                               |
| Study | Oliveira-Ciabati et al |                                                                                                                                   |  |  |  |  |  |  |                                                                                                                                                                                                                                                           |  |
|       |                        | <div>D1: Rationale</div> <div>D2: Context</div> <div>D3: Development</div> <div>D4: Implementation</div> <div>D5: Evaluation</div> <div>D6: Outcomes</div> <div>D7: Adaptability</div> <div>D8: Sustainability</div> |                                                                                     |                                                                                     |                                                                                     |                                                                                     |                                                                                       |                                                                                       | <div>Judgement</div> <div> High</div> <div> Some concerns</div> <div> Low</div> |                                                                                       |
