# Supplementary material
Source: HighWire-hosted journal article supplement (https://bmjopen.bmj.com/content/15/2/e089671)

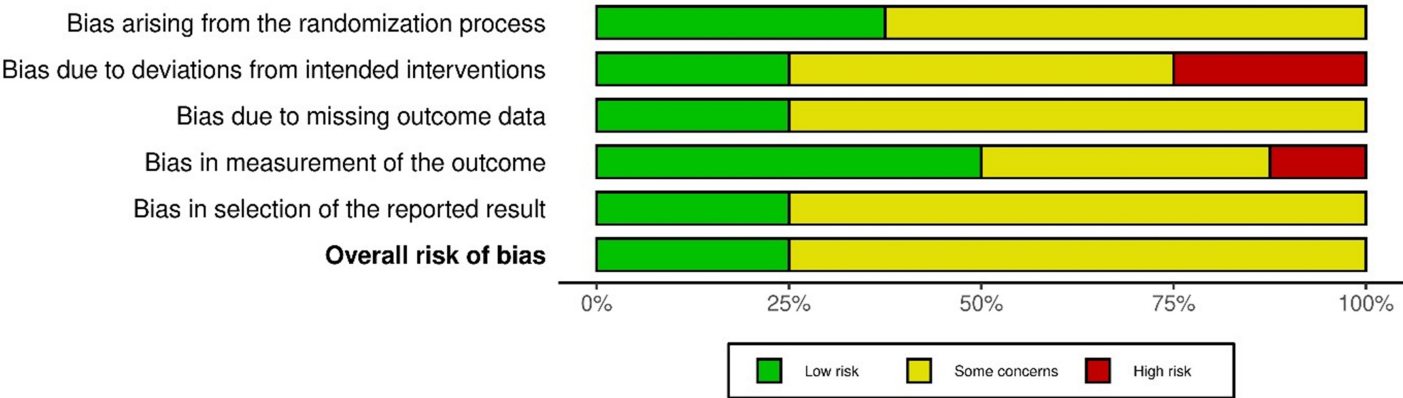

Supplement: inline-supplementary-material-5 [file inline-supplementary-material-5.pdf]

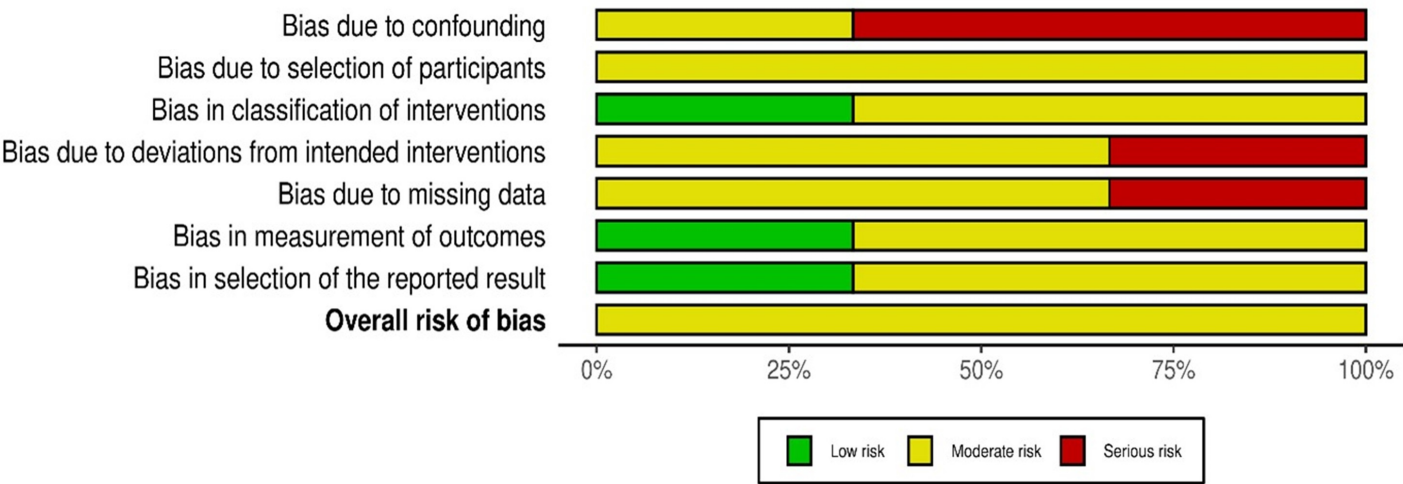

Supplement: inline-supplementary-material-6 [file inline-supplementary-material-6.pdf]

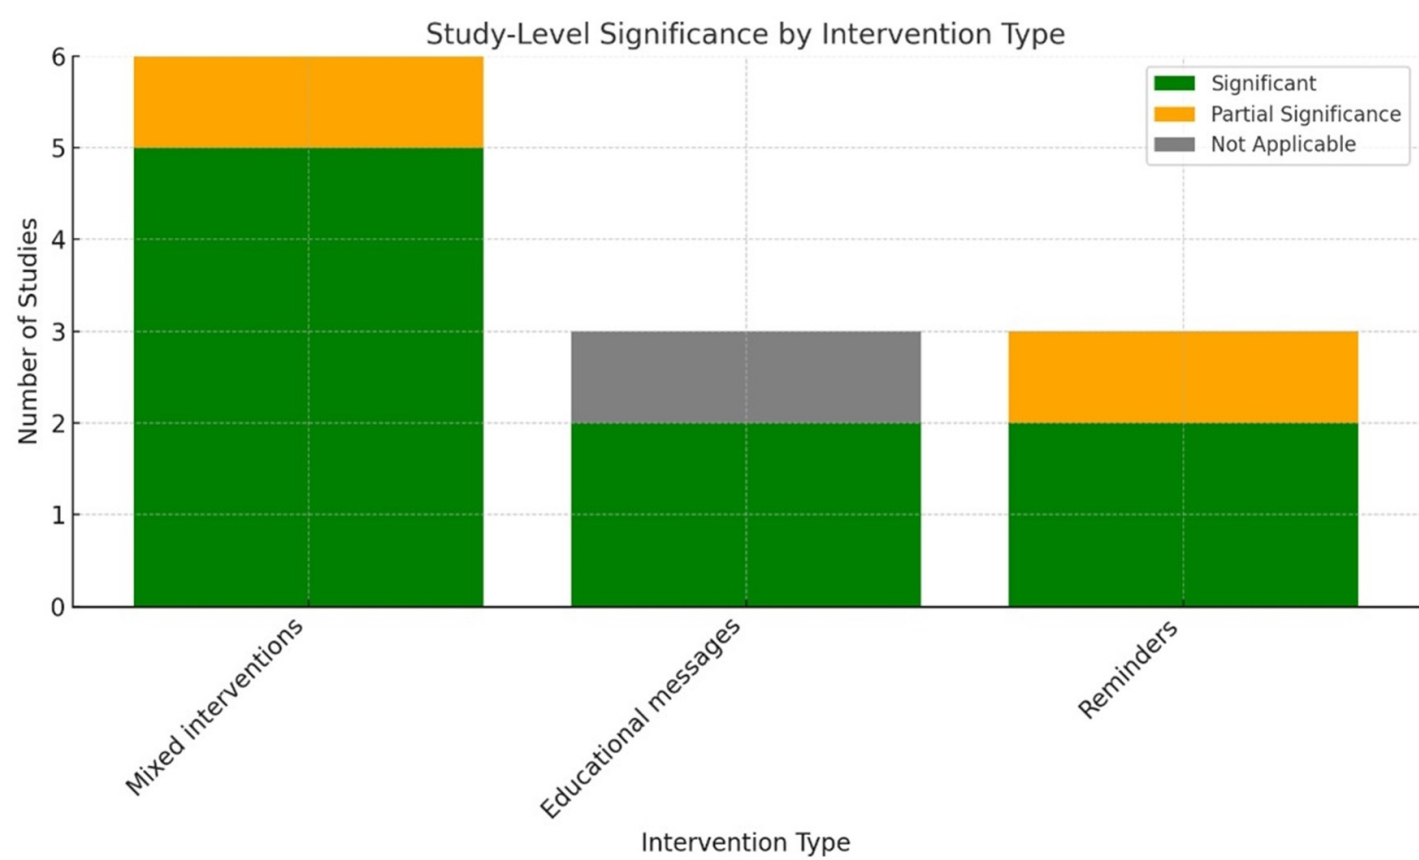

Supplement: inline-supplementary-material-9 [file inline-supplementary-material-9.pdf]
